# Supplementary material
Source: PubMed Central journal article supplement (PMC4074288)
Supplement: supp_216.18.3474_JEB087403.pdf [file supp_216.18.3474_JEB087403.pdf]

Figure S1. qRT-PCR results for *arrestin-2*.

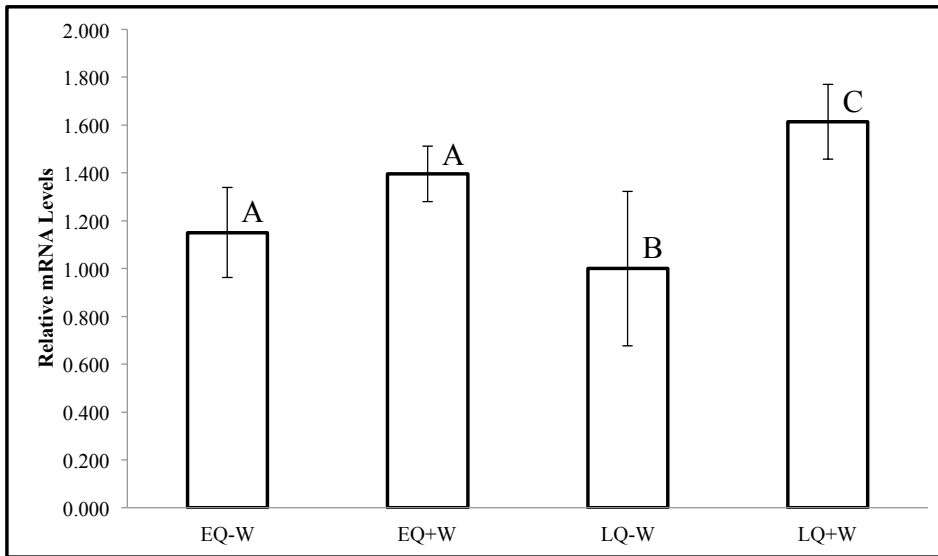

Bars represent means  $\pm$  SE. qRT-PCR results: ANOVA,  $P_{\text{stage}(df=1)} > 0.05$ ,  $P_{\text{workers}(df=1)} < 0.01$ ,  $P_{\text{stage} \times \text{workers}(df=1)} > 0.05$ ; pairwise tests, significant ( $P < 0.01$ ) in late queens with vs. without workers. Microarray results: ANOVA, significant (FDR-corrected  $P < 0.05$ ) for main effect of workers; pairwise tests: significant (FDR-corrected  $P < 0.05$ ) in late queens with vs. without workers (other tests N.S.).

Figure S2. qRT-PCR results for *TBC1 domain family, member 10b*.

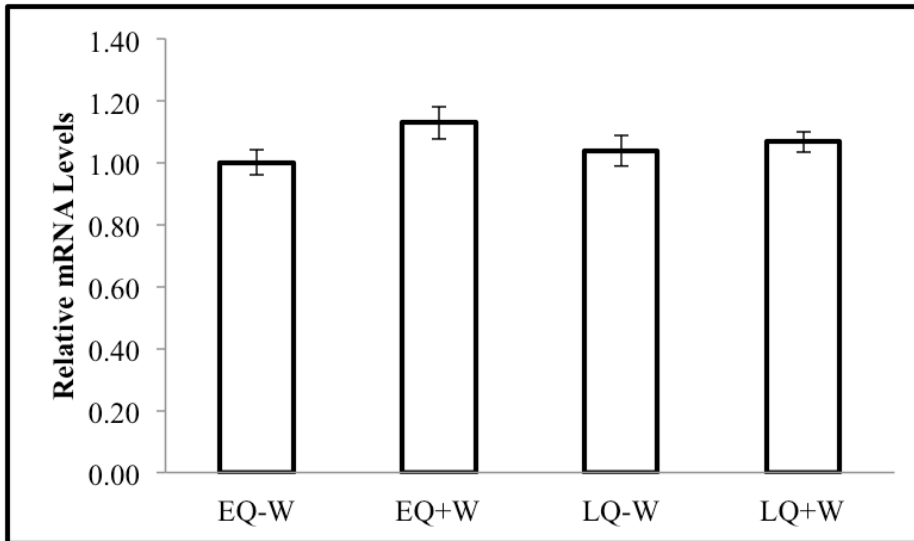

Bars represent means  $\pm$  SE. qRT-PCR results: ANOVA,  $P_{\text{stage}(df=1)} > 0.05$ ,  $P_{\text{workers}(df=1)} = 0.07$ ,  $P_{\text{stage} \times \text{workers}(df=1)} > 0.05$ ; pairwise tests, N.S. Microarray results: ANOVA, significant (FDR-corrected  $P < 0.05$ ) for main effects of stage of queen, workers, and interaction; pairwise tests, significant (FDR-corrected  $P < 0.05$ ) in late queens with vs. without workers and in queens without workers, late vs. early stage (other tests N.S.).

Figure S3. qRT-PCR results for *inositol 1,4,5,-tris-phosphate receptor*

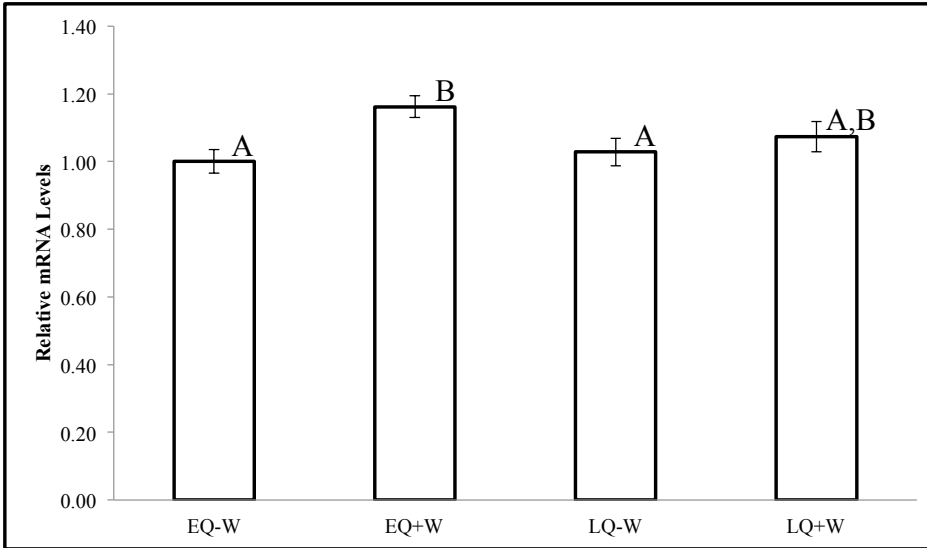

Bars represent means  $\pm$  SE. qRT-PCR results: ANOVA,  $P_{\text{stage}(df=1)} > 0.05$ ,  $P_{\text{workers}(df=1)} < 0.01$ ,  $P_{\text{stage} \times \text{workers}(df=1)} > 0.05$ ; pairwise tests, significant ( $P < 0.01$ ) in early queens, with vs. without workers. Microarray results, ANOVA: significant (FDR-corrected  $P < 0.05$ ) for main effect of stage of queen; microarray results, pairwise tests: significant (FDR-corrected  $P < 0.05$ ) in queens without workers, late vs. early stage (other tests N.S.).

Figure S4. qRT-PCR results for *CG8369*.

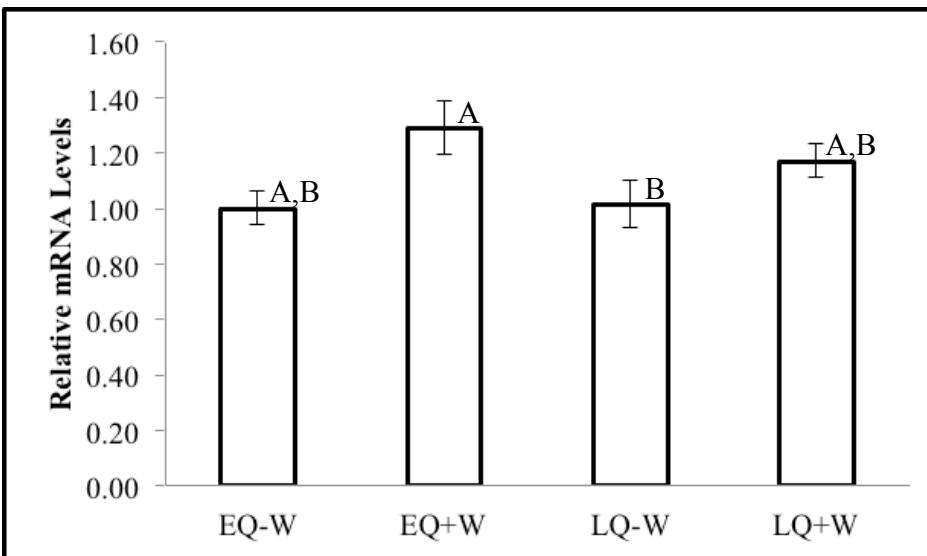

Bars represent means  $\pm$  SE. qRT-PCR results: ANOVA,  $P_{\text{stage}(df=1)} > 0.05$ ,  $P_{\text{workers}(df=1)} < 0.01$ ,  $P_{\text{stage} \times \text{workers}(df=1)} > 0.05$ ; pairwise tests, significant ( $P < 0.05$ ) in early queens, with vs. without workers. Microarray results: ANOVA, significant (FDR-corrected  $P < 0.05$ ) for main effects of stage of queen, workers, and interaction; pairwise tests, significant (FDR-corrected  $P < 0.05$ ) in late queens with vs. without workers and in queens without workers, late vs. early stage (other tests N.S.).

Figure S5. qRT-PCR results for *nejire*.

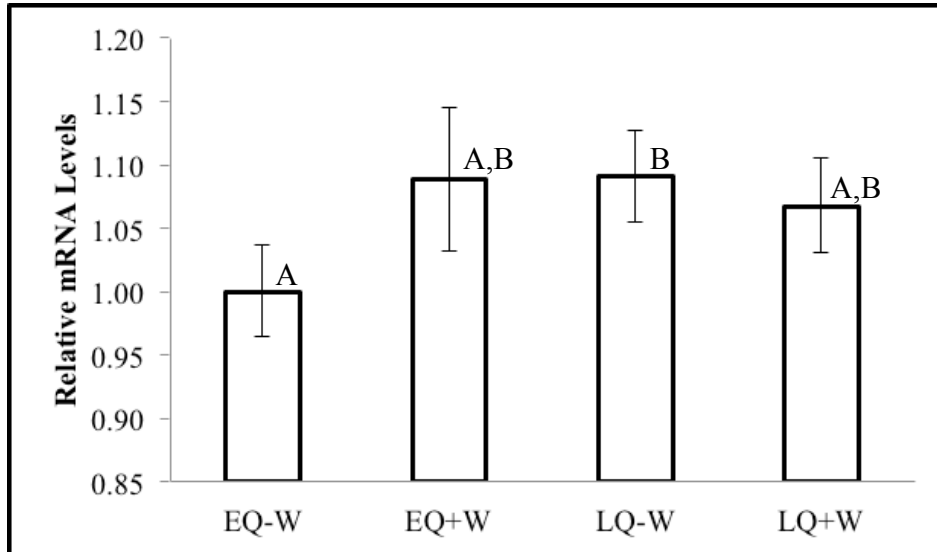

Bars represent means  $\pm$  SE. qRT-PCR results: ANOVA,  $P_{\text{stage}(df=1)} > 0.05$ ,  $P_{\text{workers}(df=1)} > 0.05$ ,  $P_{\text{stage} \times \text{workers}(df=1)} > 0.05$ ; pairwise tests, not significant. Microarray results: ANOVA, significant (FDR-corrected  $P < 0.05$ ) for main effect of stage; pairwise tests, significant (FDR-corrected  $P < 0.05$ ) in queens without workers, late vs. early stage (other tests N.S.).

Figure S6. qRT-PCR results for *calcium/calmodulin-dependent protein kinase*.

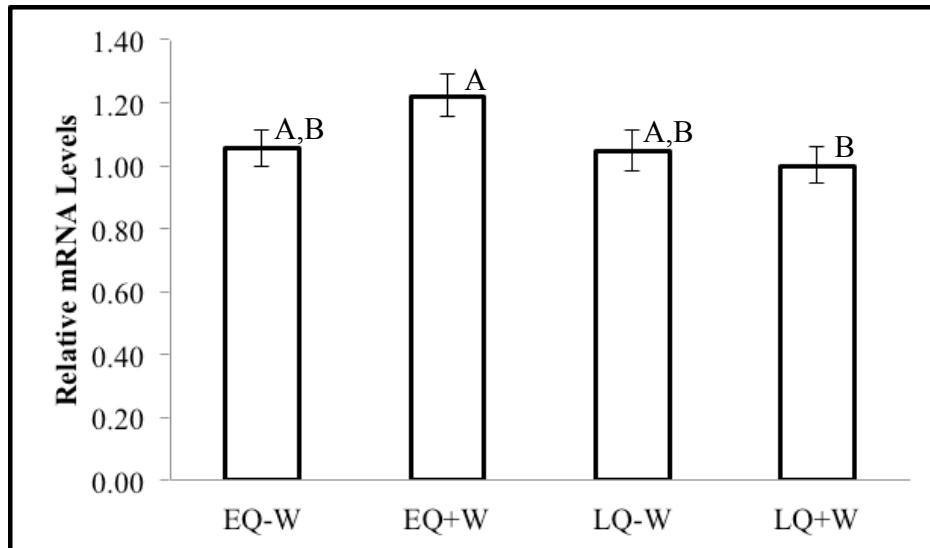

Bars represent means  $\pm$  SE. qRT-PCR results: ANOVA,  $P_{\text{stage}(df=1)} = 0.08$ ,  $P_{\text{workers}(df=1)} > 0.05$ ,  $P_{\text{stage} \times \text{workers}(df=1)} > 0.05$ ; pairwise tests, significant ( $P < 0.05$ ) in queens with workers, early vs. late stage. Microarray results: ANOVA, significant (FDR-corrected  $P < 0.05$ ) for main effect of stage of queen; microarray results; pairwise tests, significant (FDR-corrected  $P < 0.05$ ) in queens without workers, late vs. early stage (other tests N.S.).

Figure S7. qRT-PCR results for *phosphopantothenoylcysteine decarboxylase*.

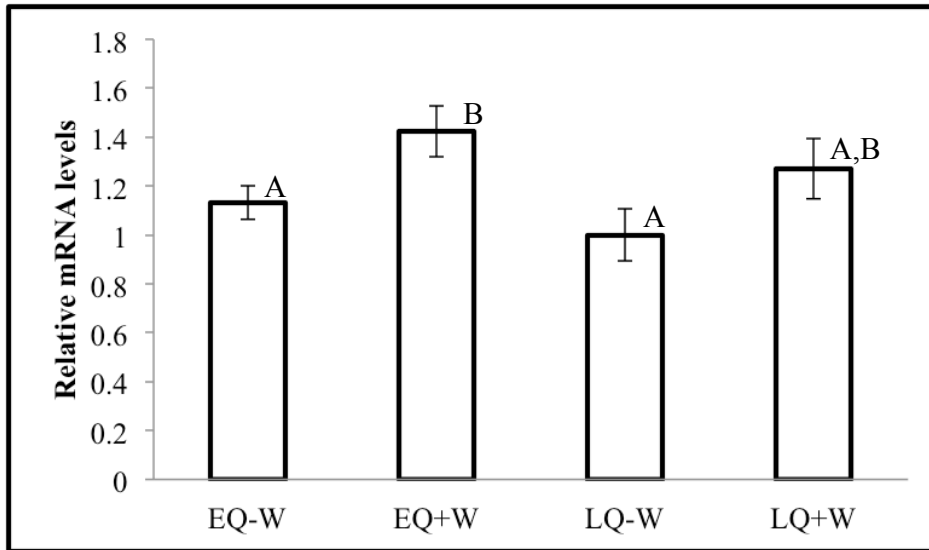

Bars represent means  $\pm$  SE. ANOVA:  $P_{\text{stage}(df=1)} > 0.05$ ,  $P_{\text{workers}(df=1)} < 0.01$ ,  $P_{\text{stage} \times \text{workers}(df=1)} > 0.05$ . Microarray results, ANOVA and pairwise tests: not significant (FDR-corrected  $P < 0.05$ ).

Figure S8. qRT-PCR results for *unchar* LOC551381.

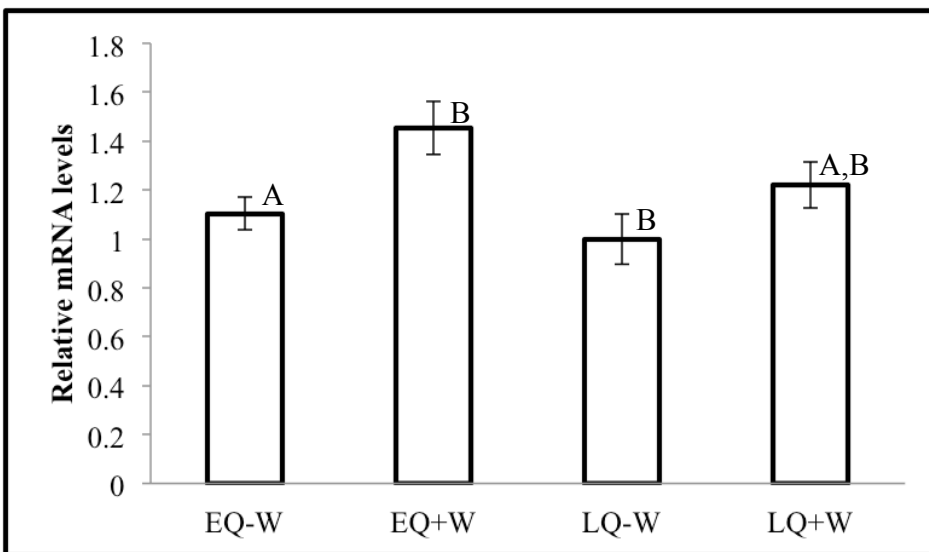

Bars represent means  $\pm$  SE. ANOVA:  $P_{\text{stage}(df=1)} > 0.05$ ,  $P_{\text{workers}(df=1)} < 0.01$ ,  $P_{\text{stage} \times \text{workers}(df=1)} > 0.05$ . Microarray results, ANOVA and pairwise tests: not significant (FDR-corrected  $P < 0.05$ ).

Figure S9. qRT-PCR results for *rcp1*.

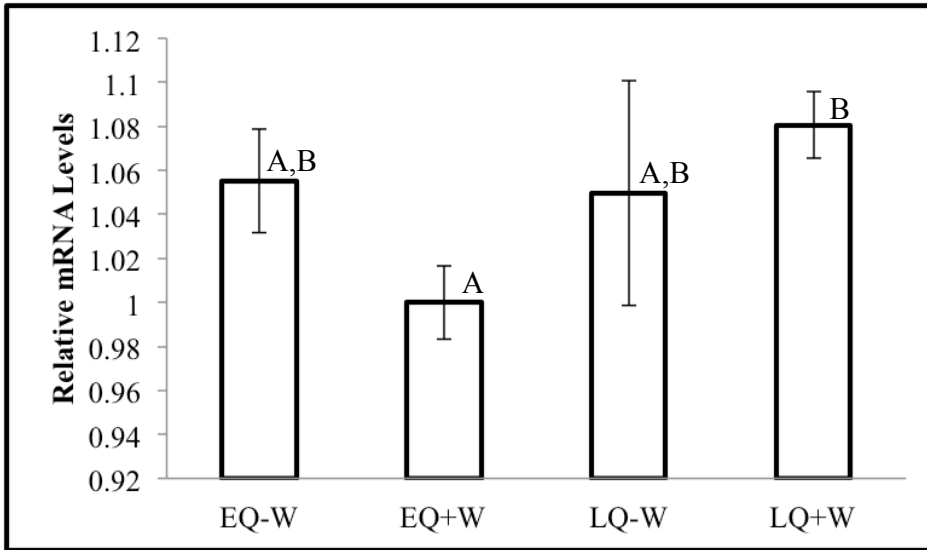

Bars represent means  $\pm$  SE. ANOVA,  $P_{\text{stage}(df=1)} > 0.05$ ,  $P_{\text{workers}(df=1)} > 0.05$ ,  $P_{\text{stage} \times \text{workers}(df=1)} > 0.05$ ; pairwise tests, significant ( $P < 0.01$ ) in queens with workers, late vs. early stage (other tests N.S.).

Figure S10. qRT-PCR results for *S8*.

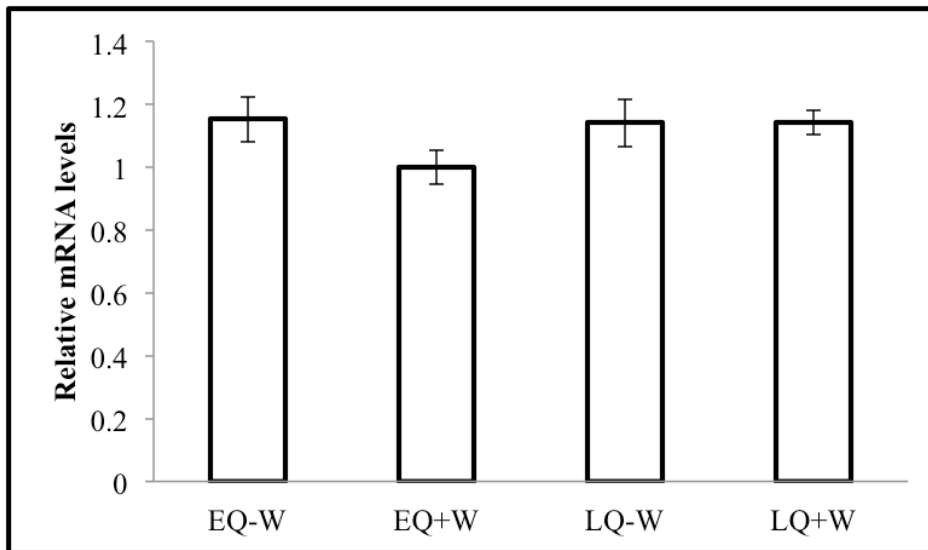

Bars represent means  $\pm$  SE. ANOVA,  $P_{\text{stage}(df=1)} > 0.05$ ,  $P_{\text{workers}(df=1)} > 0.05$ ,  $P_{\text{stage} \times \text{workers}(df=1)} > 0.05$ ; pairwise tests, not significant.

Figure S11. Comparison of gene lists from Pairwise and Rank Product Tests.

|                                                              |     |                                                 |    |                                                               |     |                                                 |    |
|--------------------------------------------------------------|-----|-------------------------------------------------|----|---------------------------------------------------------------|-----|-------------------------------------------------|----|
| <b>Up in Early-Stage Queens with Workers (vs. Without)</b>   |     | <b>Rank Product Test (<math>n = 8</math>)</b>   |    | <b>Up in Queens with Workers, Early-Stage (vs. Late)</b>      |     | <b>Rank Product Test (<math>n = 28</math>)</b>  |    |
|                                                              |     | Yes                                             | No |                                                               |     | Yes                                             | No |
| <b>Pairwise Test (<math>n = 0</math>)</b>                    | Yes | 0                                               | 0  | <b>Pairwise Test (<math>n = 0</math>)</b>                     | Yes | 0                                               | 0  |
|                                                              | No  | 8                                               |    |                                                               | No  | 28                                              |    |
| <b>Down in Early Stage Queens with Workers (vs. Without)</b> |     | <b>Rank Product Test (<math>n = 0</math>)</b>   |    | <b>Down in Queens with Workers, Early-Stage (vs. Late)</b>    |     | <b>Rank Product Test (<math>n = 18</math>)</b>  |    |
|                                                              |     | Yes                                             | No |                                                               |     | Yes                                             | No |
| <b>Pairwise Test (<math>n = 0</math>)</b>                    | Yes | 0                                               | 0  | <b>Pairwise Test (<math>n = 0</math>)</b>                     | Yes | 0                                               | 0  |
|                                                              | No  | 0                                               |    |                                                               | No  | 18                                              |    |
| <b>Up in Late-Stage Queens with Workers (vs. Without)</b>    |     | <b>Rank Product Test (<math>n = 30</math>)</b>  |    | <b>Up in Queens without Workers, Early Stage (vs. Late)</b>   |     | <b>Rank Product Test (<math>n = 453</math>)</b> |    |
|                                                              |     | Yes                                             | No |                                                               |     | Yes                                             | No |
| <b>Pairwise Test (<math>n = 303</math>)</b>                  | Yes | 30                                              | 0  | <b>Pairwise Test (<math>n = 464</math>)</b>                   | Yes | 373                                             | 91 |
|                                                              | No  | 273                                             |    |                                                               | No  | 80                                              |    |
| <b>Down in Late-Stage Queens with Workers (vs. Without)</b>  |     | <b>Rank Product Test (<math>n = 132</math>)</b> |    | <b>Down in Queens without Workers, Early Stage (vs. Late)</b> |     | <b>Rank Product Test (<math>n = 566</math>)</b> |    |
|                                                              |     | Yes                                             | No |                                                               |     | Yes                                             | No |
| <b>Pairwise Test (<math>n = 7</math>)</b>                    | Yes | 7                                               | 0  | <b>Pairwise Test (<math>n = 441</math>)</b>                   | Yes | 407                                             | 34 |
|                                                              | No  | 125                                             |    |                                                               | No  | 159                                             |    |

“Yes” = gene(s) present in list; “No” = gene(s) not present in list.

**Table S1. Functional terms enriched in the lists of differentially expressed genes.**

|                                                      | TERM                                                                                         | GO ID          | ENRICH.    | P - VALUE |
|------------------------------------------------------|----------------------------------------------------------------------------------------------|----------------|------------|-----------|
| <i>Main Effect of Stage of Queen (ANOVA)</i>         |                                                                                              |                |            |           |
| <i>Biological Processes</i>                          | chitin metabolic process                                                                     | GO:0006030     | 5.55       | 0.00891   |
|                                                      | photoreceptor cell differentiation                                                           | GO:0046530     | 2.56       | 0.02020   |
|                                                      | chromosome segregation                                                                       | GO:0007059     | 2.71       | 0.02326   |
|                                                      | cellular ion homeostasis                                                                     | GO:0006873     | 4.07       | 0.02848   |
|                                                      | cognition                                                                                    | GO:0050890     | 2.13       | 0.02849   |
|                                                      | compound eye photoreceptor cell differentiation                                              | GO:0001751     | 2.57       | 0.03063   |
|                                                      | negative regulation of nitrogen compound metabolic process                                   | GO:0051172     | 2.18       | 0.03432   |
|                                                      | negative regulation of nucleobase, nucleoside, nucleotide and nucleic acid metabolic process | GO:0045934     | 2.18       | 0.03432   |
|                                                      | behavior                                                                                     | GO:0007610     | 1.84       | 0.03524   |
|                                                      | ion homeostasis                                                                              | GO:0050801     | 3.82       | 0.03561   |
|                                                      | eye photoreceptor cell differentiation                                                       | GO:0001754     | 2.44       | 0.03943   |
|                                                      | negative regulation of RNA metabolic process                                                 | GO:0051253     | 2.24       | 0.04133   |
|                                                      | cellular chemical homeostasis                                                                | GO:0055082     | 3.59       | 0.04370   |
|                                                      | neurological system process                                                                  | GO:0050877     | 1.59       | 0.04536   |
|                                                      | negative regulation of transcription                                                         | GO:0016481     | 2.20       | 0.04590   |
|                                                      | <i>Molecular Functions</i>                                                                   | chitin binding | GO:0008061 | 6.28      |
| solute:cation symporter activity                     |                                                                                              | GO:0015294     | 3.23       | 0.03180   |
| solute:sodium symporter activity                     |                                                                                              | GO:0015370     | 3.77       | 0.03665   |
| adenyl nucleotide binding                            |                                                                                              | GO:0030554     | 1.32       | 0.04459   |
| symporter activity                                   |                                                                                              | GO:0015293     | 2.95       | 0.04556   |
| polysaccharide binding                               |                                                                                              | GO:0030247     | 3.54       | 0.04559   |
| pattern binding                                      |                                                                                              | GO:0001871     | 3.54       | 0.04559   |
| purine nucleoside binding                            |                                                                                              | GO:0001883     | 1.32       | 0.04827   |
| <i>Upregulated in LQW- vs. EQW- (Pairwise Tests)</i> |                                                                                              |                |            |           |
| <i>Biological Processes</i>                          | chromatin organization                                                                       | GO:0006325     | 1.93       | 0.01395   |
|                                                      | chromosome organization                                                                      | GO:0051276     | 1.71       | 0.01555   |
|                                                      | translation                                                                                  | GO:0006412     | 1.53       | 0.01584   |
|                                                      | DNA packaging                                                                                | GO:0006323     | 2.71       | 0.02148   |
|                                                      | regulation of Rab GTPase activity                                                            | GO:0032313     | 3.31       | 0.02709   |
|                                                      | regulation of Rab protein signal transduction                                                | GO:0032483     | 3.31       | 0.02709   |
|                                                      | cellular macromolecular complex subunit organization                                         | GO:0034621     | 1.67       | 0.03372   |
|                                                      | regulation of hydrolase activity                                                             | GO:0051336     | 2.27       | 0.03698   |
|                                                      | regulation of Ras GTPase activity                                                            | GO:0032318     | 2.68       | 0.03769   |

|                                                                 |                                                                     |            |      |         |
|-----------------------------------------------------------------|---------------------------------------------------------------------|------------|------|---------|
|                                                                 | nucleosome organization                                             | GO:0034728 | 2.68 | 0.03769 |
|                                                                 | cellular cation homeostasis                                         | GO:0030003 | 3.67 | 0.03781 |
|                                                                 | chromosome segregation                                              | GO:0007059 | 2.20 | 0.04307 |
|                                                                 | regulation of Ras protein signal transduction                       | GO:0046578 | 2.15 | 0.04980 |
| <i>Molecular Functions</i>                                      | metal ion binding                                                   | GO:0046872 | 1.34 | 0.00128 |
|                                                                 | ion binding                                                         | GO:0043167 | 1.32 | 0.00213 |
|                                                                 | cation binding                                                      | GO:0043169 | 1.31 | 0.00264 |
|                                                                 | adenyl nucleotide binding                                           | GO:0030554 | 1.41 | 0.00412 |
|                                                                 | transition metal ion binding                                        | GO:0046914 | 1.35 | 0.00461 |
|                                                                 | purine nucleoside binding                                           | GO:0001883 | 1.40 | 0.00470 |
|                                                                 | nucleoside binding                                                  | GO:0001882 | 1.39 | 0.00572 |
|                                                                 | ATP binding                                                         | GO:0005524 | 1.40 | 0.00620 |
|                                                                 | adenyl ribonucleotide binding                                       | GO:0032559 | 1.39 | 0.00662 |
|                                                                 | purine nucleotide binding                                           | GO:0017076 | 1.29 | 0.01472 |
|                                                                 | purine ribonucleotide binding                                       | GO:0032555 | 1.28 | 0.02010 |
|                                                                 | ribonucleotide binding                                              | GO:0032553 | 1.28 | 0.02010 |
|                                                                 | zinc ion binding                                                    | GO:0008270 | 1.31 | 0.02782 |
|                                                                 | nucleotide binding                                                  | GO:0000166 | 1.23 | 0.02829 |
|                                                                 | aminopeptidase activity                                             | GO:0004177 | 3.83 | 0.03206 |
|                                                                 | DNA binding                                                         | GO:0003677 | 1.35 | 0.04143 |
| <b><i>Downregulated in LQW- vs. EQW- (Pairwise Tests)</i></b>   |                                                                     |            |      |         |
| <i>Biological Processes</i>                                     | ion transport                                                       | GO:0006811 | 2.06 | 0.00137 |
|                                                                 | anion transport                                                     | GO:0006820 | 3.12 | 0.03512 |
|                                                                 | carbohydrate binding                                                | GO:0030246 | 2.88 | 0.00903 |
|                                                                 | anion transmembrane transporter activity                            | GO:0008509 | 2.70 | 0.01374 |
|                                                                 | transition metal ion transmembrane transporter activity             | GO:0046915 | 4.64 | 0.01609 |
|                                                                 | polysaccharide binding                                              | GO:0030247 | 3.48 | 0.02207 |
|                                                                 | pattern binding                                                     | GO:0001871 | 3.48 | 0.02207 |
|                                                                 | di-, tri-valent inorganic cation transmembrane transporter activity | GO:0015082 | 4.22 | 0.02319 |
|                                                                 | symporter activity                                                  | GO:0015293 | 2.83 | 0.03009 |
|                                                                 | structural molecule activity                                        | GO:0005198 | 1.52 | 0.03670 |
| <b><i>Upregulated in LQW+ vs. LQW- (Rank Product Tests)</i></b> |                                                                     |            |      |         |
| <i>Biological Processes</i>                                     | ion transport                                                       | GO:0006811 | 2.35 | 0.00040 |
|                                                                 | photoreceptor cell differentiation                                  | GO:0046530 | 2.91 | 0.00356 |
|                                                                 | regulation of Ras protein signal transduction                       | GO:0046578 | 3.30 | 0.00467 |
|                                                                 | adult behavior                                                      | GO:0030534 | 3.30 | 0.00467 |
|                                                                 | regulation of Rho protein signal transduction                       | GO:0035023 | 6.21 | 0.00644 |
|                                                                 | regulation of small GTPase mediated signal transduction             | GO:0051056 | 2.90 | 0.01029 |
|                                                                 | photoreceptor cell fate commitment                                  | GO:0046552 | 4.03 | 0.01372 |



|                                                                 |                                                                   |            |      |         |
|-----------------------------------------------------------------|-------------------------------------------------------------------|------------|------|---------|
|                                                                 | sodium ion transport                                              | GO:0006814 | 5.04 | 0.01417 |
|                                                                 | neuron fate commitment                                            | GO:0048663 | 3.87 | 0.01631 |
|                                                                 | cation transport                                                  | GO:0006812 | 2.08 | 0.01982 |
|                                                                 | tube development                                                  | GO:0035295 | 2.69 | 0.02585 |
|                                                                 | regulation of cell morphogenesis                                  | GO:0022604 | 2.31 | 0.02620 |
|                                                                 | regulation of cell shape                                          | GO:0008360 | 2.46 | 0.02649 |
|                                                                 | adult locomotory behavior                                         | GO:0008344 | 3.23 | 0.03412 |
|                                                                 | neuron differentiation                                            | GO:0030182 | 1.63 | 0.03809 |
|                                                                 | compound eye photoreceptor fate commitment                        | GO:0001752 | 3.67 | 0.04267 |
|                                                                 | alcohol catabolic process                                         | GO:0046164 | 3.67 | 0.04267 |
|                                                                 | eye photoreceptor cell fate commitment                            | GO:0042706 | 3.67 | 0.04267 |
|                                                                 | metal ion transport                                               | GO:0030001 | 2.23 | 0.04408 |
|                                                                 | respiratory system development                                    | GO:0060541 | 2.10 | 0.04495 |
|                                                                 | open tracheal system development                                  | GO:0007424 | 2.10 | 0.04495 |
|                                                                 | tube morphogenesis                                                | GO:0035239 | 2.63 | 0.04591 |
|                                                                 | cellular carbohydrate catabolic process                           | GO:0044275 | 3.51 | 0.04925 |
|                                                                 | monovalent inorganic cation transport                             | GO:0015672 | 2.35 | 0.04969 |
|                                                                 | compound eye photoreceptor cell differentiation                   | GO:0001751 | 2.35 | 0.04969 |
| <i>Molecular Function</i>                                       | hexose transmembrane transporter activity                         | GO:0015149 | 7.81 | 0.00248 |
|                                                                 | glucose transmembrane transporter activity                        | GO:0005355 | 7.81 | 0.00248 |
|                                                                 | monosaccharide transmembrane transporter activity                 | GO:0015145 | 7.10 | 0.00370 |
|                                                                 | Ras guanyl-nucleotide exchange factor activity                    | GO:0005088 | 6.01 | 0.00725 |
|                                                                 | cofactor binding                                                  | GO:0048037 | 2.23 | 0.00838 |
|                                                                 | NAD or NADH binding                                               | GO:0051287 | 4.46 | 0.00879 |
|                                                                 | sugar transmembrane transporter activity                          | GO:0051119 | 5.58 | 0.00966 |
|                                                                 | small GTPase regulator activity                                   | GO:0005083 | 2.52 | 0.01536 |
|                                                                 | anion transmembrane transporter activity                          | GO:0008509 | 2.66 | 0.02739 |
|                                                                 | GTPase regulator activity                                         | GO:0030695 | 2.05 | 0.03882 |
|                                                                 | coenzyme binding                                                  | GO:0050662 | 2.14 | 0.04020 |
|                                                                 | nucleoside-triphosphatase regulator activity                      | GO:0060589 | 1.97 | 0.04769 |
|                                                                 | <b><i>Downregulated in LQW+ vs. LQW- (Rank Product Tests)</i></b> |            |      |         |
| <i>Biological Processes</i>                                     | translation                                                       | GO:0006412 | 2.20 | 0.00847 |
|                                                                 | cell cycle phase                                                  | GO:0022403 | 2.21 | 0.01633 |
|                                                                 | mitotic spindle elongation                                        | GO:0000022 | 3.91 | 0.01668 |
|                                                                 | cell cycle process                                                | GO:0022402 | 2.10 | 0.01705 |
|                                                                 | spindle elongation                                                | GO:0051231 | 3.84 | 0.01790 |
|                                                                 | M phase                                                           | GO:0000279 | 2.10 | 0.03146 |
|                                                                 | cell cycle                                                        | GO:0007049 | 1.82 | 0.04596 |
| <i>Molecular Functions</i>                                      | structural constituent of ribosome                                | GO:0003735 | 2.74 | 0.00910 |
|                                                                 | structural molecule activity                                      | GO:0005198 | 2.01 | 0.04095 |
| <b><i>Upregulated in LQW- vs. EQW- (Rank Product Tests)</i></b> |                                                                   |            |      |         |

|                                                                   |                                               |                               |            |         |         |
|-------------------------------------------------------------------|-----------------------------------------------|-------------------------------|------------|---------|---------|
| <i>Biological Processes</i>                                       | chromosome organization                       | GO:0051276                    | 1.98       | 0.00096 |         |
|                                                                   | chromatin organization                        | GO:0006325                    | 2.21       | 0.00166 |         |
|                                                                   | chromosome segregation                        | GO:0007059                    | 2.70       | 0.00344 |         |
|                                                                   | M phase                                       | GO:0000279                    | 1.70       | 0.00414 |         |
|                                                                   | cell cycle phase                              | GO:0022403                    | 1.64       | 0.00698 |         |
|                                                                   | spindle organization                          | GO:0007051                    | 1.80       | 0.00831 |         |
|                                                                   | mitotic spindle elongation                    | GO:0000022                    | 2.31       | 0.01165 |         |
|                                                                   | dsRNA transport                               | GO:0033227                    | 4.05       | 0.01204 |         |
|                                                                   | chromosome condensation                       | GO:0030261                    | 4.05       | 0.01204 |         |
|                                                                   | cell cycle                                    | GO:0007049                    | 1.49       | 0.01266 |         |
|                                                                   | chromatin modification                        | GO:0016568                    | 2.10       | 0.01291 |         |
|                                                                   | spindle elongation                            | GO:0051231                    | 2.27       | 0.01328 |         |
|                                                                   | regulation of hydrolase activity              | GO:0051336                    | 2.51       | 0.01450 |         |
|                                                                   | mitotic cell cycle                            | GO:0000278                    | 1.58       | 0.01635 |         |
|                                                                   | mitotic spindle organization                  | GO:0007052                    | 1.77       | 0.01799 |         |
|                                                                   | microtubule cytoskeleton organization         | GO:0000226                    | 1.60       | 0.01957 |         |
|                                                                   | regulation of Rab protein signal transduction | GO:0032483                    | 3.60       | 0.02027 |         |
|                                                                   | regulation of Rab GTPase activity             | GO:0032313                    | 3.60       | 0.02027 |         |
|                                                                   | programmed cell death                         | GO:0012501                    | 2.03       | 0.02199 |         |
|                                                                   | microtubule-based process                     | GO:0007017                    | 1.50       | 0.02228 |         |
|                                                                   | regulation of Ras GTPase activity             | GO:0032318                    | 3.02       | 0.02303 |         |
|                                                                   | cell cycle process                            | GO:0022402                    | 1.48       | 0.02339 |         |
|                                                                   | DNA packaging                                 | GO:0006323                    | 2.70       | 0.02373 |         |
|                                                                   | death                                         | GO:0016265                    | 2.00       | 0.02442 |         |
|                                                                   | cell death                                    | GO:0008219                    | 2.00       | 0.02442 |         |
|                                                                   | apoptosis                                     | GO:0006915                    | 2.62       | 0.02782 |         |
|                                                                   | chromatin remodeling                          | GO:0006338                    | 2.62       | 0.02782 |         |
|                                                                   | cellular amino acid biosynthetic process      | GO:0008652                    | 3.24       | 0.03149 |         |
|                                                                   | regulation of Ras protein signal transduction | GO:0046578                    | 2.21       | 0.04490 |         |
|                                                                   | <i>Molecular Functions</i>                    | ATP binding                   | GO:0005524 | 1.47    | 0.00110 |
|                                                                   |                                               | adenyl ribonucleotide binding | GO:0032559 | 1.47    | 0.00116 |
|                                                                   |                                               | ribonucleotide binding        | GO:0032553 | 1.41    | 0.00125 |
|                                                                   |                                               | purine ribonucleotide binding | GO:0032555 | 1.41    | 0.00125 |
| adenyl nucleotide binding                                         |                                               | GO:0030554                    | 1.44       | 0.00131 |         |
| purine nucleoside binding                                         |                                               | GO:0001883                    | 1.44       | 0.00146 |         |
| purine nucleotide binding                                         |                                               | GO:0017076                    | 1.38       | 0.00166 |         |
| nucleoside binding                                                |                                               | GO:0001882                    | 1.43       | 0.00173 |         |
| nucleotide binding                                                |                                               | GO:0000166                    | 1.33       | 0.00216 |         |
| exopeptidase activity                                             |                                               | GO:0008238                    | 2.61       | 0.02799 |         |
| Rab GTPase activator activity                                     |                                               | GO:0005097                    | 3.13       | 0.03578 |         |
| aminopeptidase activity                                           |                                               | GO:0004177                    | 3.73       | 0.03768 |         |
| metal ion binding                                                 |                                               | GO:0046872                    | 1.20       | 0.04242 |         |
| <b><i>Downregulated in LQW- vs. EQW- (Rank Product Tests)</i></b> |                                               |                               |            |         |         |

|                             |                                                                                              |            |      |         |
|-----------------------------|----------------------------------------------------------------------------------------------|------------|------|---------|
| <i>Biological Processes</i> | ion transport                                                                                | GO:0006811 | 2.01 | 0.00010 |
|                             | sodium ion transport                                                                         | GO:0006814 | 3.84 | 0.00608 |
|                             | long-term memory                                                                             | GO:0007616 | 4.39 | 0.00737 |
|                             | positive regulation of macromolecule biosynthetic process                                    | GO:0010557 | 2.20 | 0.00824 |
|                             | positive regulation of transcription                                                         | GO:0045941 | 2.24 | 0.00982 |
|                             | positive regulation of cellular biosynthetic process                                         | GO:0031328 | 2.06 | 0.01069 |
|                             | positive regulation of biosynthetic process                                                  | GO:0009891 | 2.06 | 0.01069 |
|                             | positive regulation of gene expression                                                       | GO:0010628 | 2.20 | 0.01150 |
|                             | positive regulation of nitrogen compound metabolic process                                   | GO:0051173 | 2.15 | 0.01339 |
|                             | positive regulation of nucleobase, nucleoside, nucleotide and nucleic acid metabolic process | GO:0045935 | 2.15 | 0.01339 |
|                             | photoreceptor cell fate commitment                                                           | GO:0046552 | 2.93 | 0.01424 |
|                             | cation transport                                                                             | GO:0006812 | 1.74 | 0.01681 |
|                             | neuron fate commitment                                                                       | GO:0048663 | 2.81 | 0.01790 |
|                             | memory                                                                                       | GO:0007613 | 3.07 | 0.01988 |
|                             | positive regulation of macromolecule metabolic process                                       | GO:0010604 | 1.89 | 0.02792 |
|                             | biological adhesion                                                                          | GO:0022610 | 1.78 | 0.02942 |
|                             | cell adhesion                                                                                | GO:0007155 | 1.78 | 0.02942 |
|                             | compound eye photoreceptor fate commitment                                                   | GO:0001752 | 2.80 | 0.03150 |
|                             | eye photoreceptor cell fate commitment                                                       | GO:0042706 | 2.80 | 0.03150 |
|                             | monovalent inorganic cation transport                                                        | GO:0015672 | 1.92 | 0.04138 |
|                             | wing disc development                                                                        | GO:0035220 | 1.55 | 0.04394 |
|                             | ion transport                                                                                | GO:0006811 | 2.01 | 0.00010 |
|                             | sodium ion transport                                                                         | GO:0006814 | 3.84 | 0.00608 |
|                             | long-term memory                                                                             | GO:0007616 | 4.39 | 0.00737 |
|                             | positive regulation of macromolecule biosynthetic process                                    | GO:0010557 | 2.20 | 0.00824 |
|                             | positive regulation of transcription                                                         | GO:0045941 | 2.24 | 0.00982 |
|                             | positive regulation of cellular biosynthetic process                                         | GO:0031328 | 2.06 | 0.01069 |
|                             | positive regulation of biosynthetic process                                                  | GO:0009891 | 2.06 | 0.01069 |
|                             | positive regulation of gene expression                                                       | GO:0010628 | 2.20 | 0.01150 |
|                             | positive regulation of nitrogen compound metabolic process                                   | GO:0051173 | 2.15 | 0.01339 |
|                             | positive regulation of nucleobase, nucleoside, nucleotide and nucleic acid metabolic process | GO:0045935 | 2.15 | 0.01339 |
|                             | photoreceptor cell fate commitment                                                           | GO:0046552 | 2.93 | 0.01424 |
|                             | cation transport                                                                             | GO:0006812 | 1.74 | 0.01681 |

|                            |                                                        |            |      |         |
|----------------------------|--------------------------------------------------------|------------|------|---------|
|                            | neuron fate commitment                                 | GO:0048663 | 2.81 | 0.01790 |
|                            | memory                                                 | GO:0007613 | 3.07 | 0.01988 |
|                            | positive regulation of macromolecule metabolic process | GO:0010604 | 1.89 | 0.02792 |
|                            | biological adhesion                                    | GO:0022610 | 1.78 | 0.02942 |
|                            | cell adhesion                                          | GO:0007155 | 1.78 | 0.02942 |
|                            | compound eye photoreceptor fate commitment             | GO:0001752 | 2.80 | 0.03150 |
|                            | eye photoreceptor cell fate commitment                 | GO:0042706 | 2.80 | 0.03150 |
|                            | monovalent inorganic cation transport                  | GO:0015672 | 1.92 | 0.04138 |
|                            | wing disc development                                  | GO:0035220 | 1.55 | 0.04394 |
| <i>Molecular Functions</i> | L-amino acid transmembrane transporter activity        | GO:0015179 | 5.35 | 0.00867 |
|                            | symporter activity                                     | GO:0015293 | 2.59 | 0.01080 |
|                            | solute:sodium symporter activity                       | GO:0015370 | 3.15 | 0.01739 |
|                            | hexose transmembrane transporter activity              | GO:0015149 | 4.28 | 0.02151 |
|                            | glucose transmembrane transporter activity             | GO:0005355 | 4.28 | 0.02151 |
|                            | solute:cation symporter activity                       | GO:0015294 | 2.48 | 0.02222 |
|                            | alkali metal ion binding                               | GO:0031420 | 3.42 | 0.02334 |
|                            | structural molecule activity                           | GO:0005198 | 1.44 | 0.02490 |
|                            | vitamin B6 binding                                     | GO:0070279 | 2.85 | 0.02845 |
|                            | pyridoxal phosphate binding                            | GO:0030170 | 2.85 | 0.02845 |
|                            | monosaccharide transmembrane transporter activity      | GO:0015145 | 3.89 | 0.03075 |
|                            | anion transmembrane transporter activity               | GO:0008509 | 2.00 | 0.04062 |

“GO ID”=Gene Ontology ID; “Enrich.”=fold enrichment. Gene lists used for enrichment analysis significant at FDR-corrected  $P < 0.05$ . Terms with  $< 5$  genes are not included. List size for main effect of workers (ANOVA) was too small for enrichment analysis. For Pairwise Tests, the following lists were also too small to perform enrichment analysis: LQW+ vs. EQW+, EQW+ vs. EQW-, LQW+ vs. LQW-; for Rank Product Tests, the following lists were too small for GO enrichment analysis: Upregulated in LQW+ vs. EQW+, Downregulated in LQW+ vs. EQW+, Upregulated in EQW+ vs. EQW-, Downregulated in EQW+ vs. EQW-.

Table S2. Summary of qRT-PCR results for validation of microarrays.

| Gene                                               | Significant for<br>'Workers' |         | Significant for 'Stage of<br>Queen' |         |
|----------------------------------------------------|------------------------------|---------|-------------------------------------|---------|
|                                                    | Microarray                   | qRT-PCR | Microarray                          | qRT-PCR |
| <i>arrestin-2</i>                                  | *                            | *       |                                     |         |
| <i>TBC1 domain family, member 10b</i>              | *                            |         | *                                   |         |
| <i>inositol 1,4,5,-tris-phosphate receptor</i>     |                              | *       | *                                   |         |
| <i>CG8369</i>                                      | *                            | *       | *                                   |         |
| <i>nejire</i>                                      |                              |         | *                                   |         |
| <i>calcium/calmodulin-dependent protein kinase</i> |                              |         | *                                   |         |
| <i>phosphopantothenoylcysteine decarboxylase</i>   |                              | *       |                                     |         |
| <i>unchar LOC551381</i>                            |                              | *       |                                     |         |
